# Supplementary material for: Analysis of pairwise correlations in multi-parametric PET/MR data for biological tumor characterization and treatment individualization strategies
Source: PubMed Central journal article supplement (PMC4869757; doi:10.1007/s00259-016-3307-7), 2016-02-13

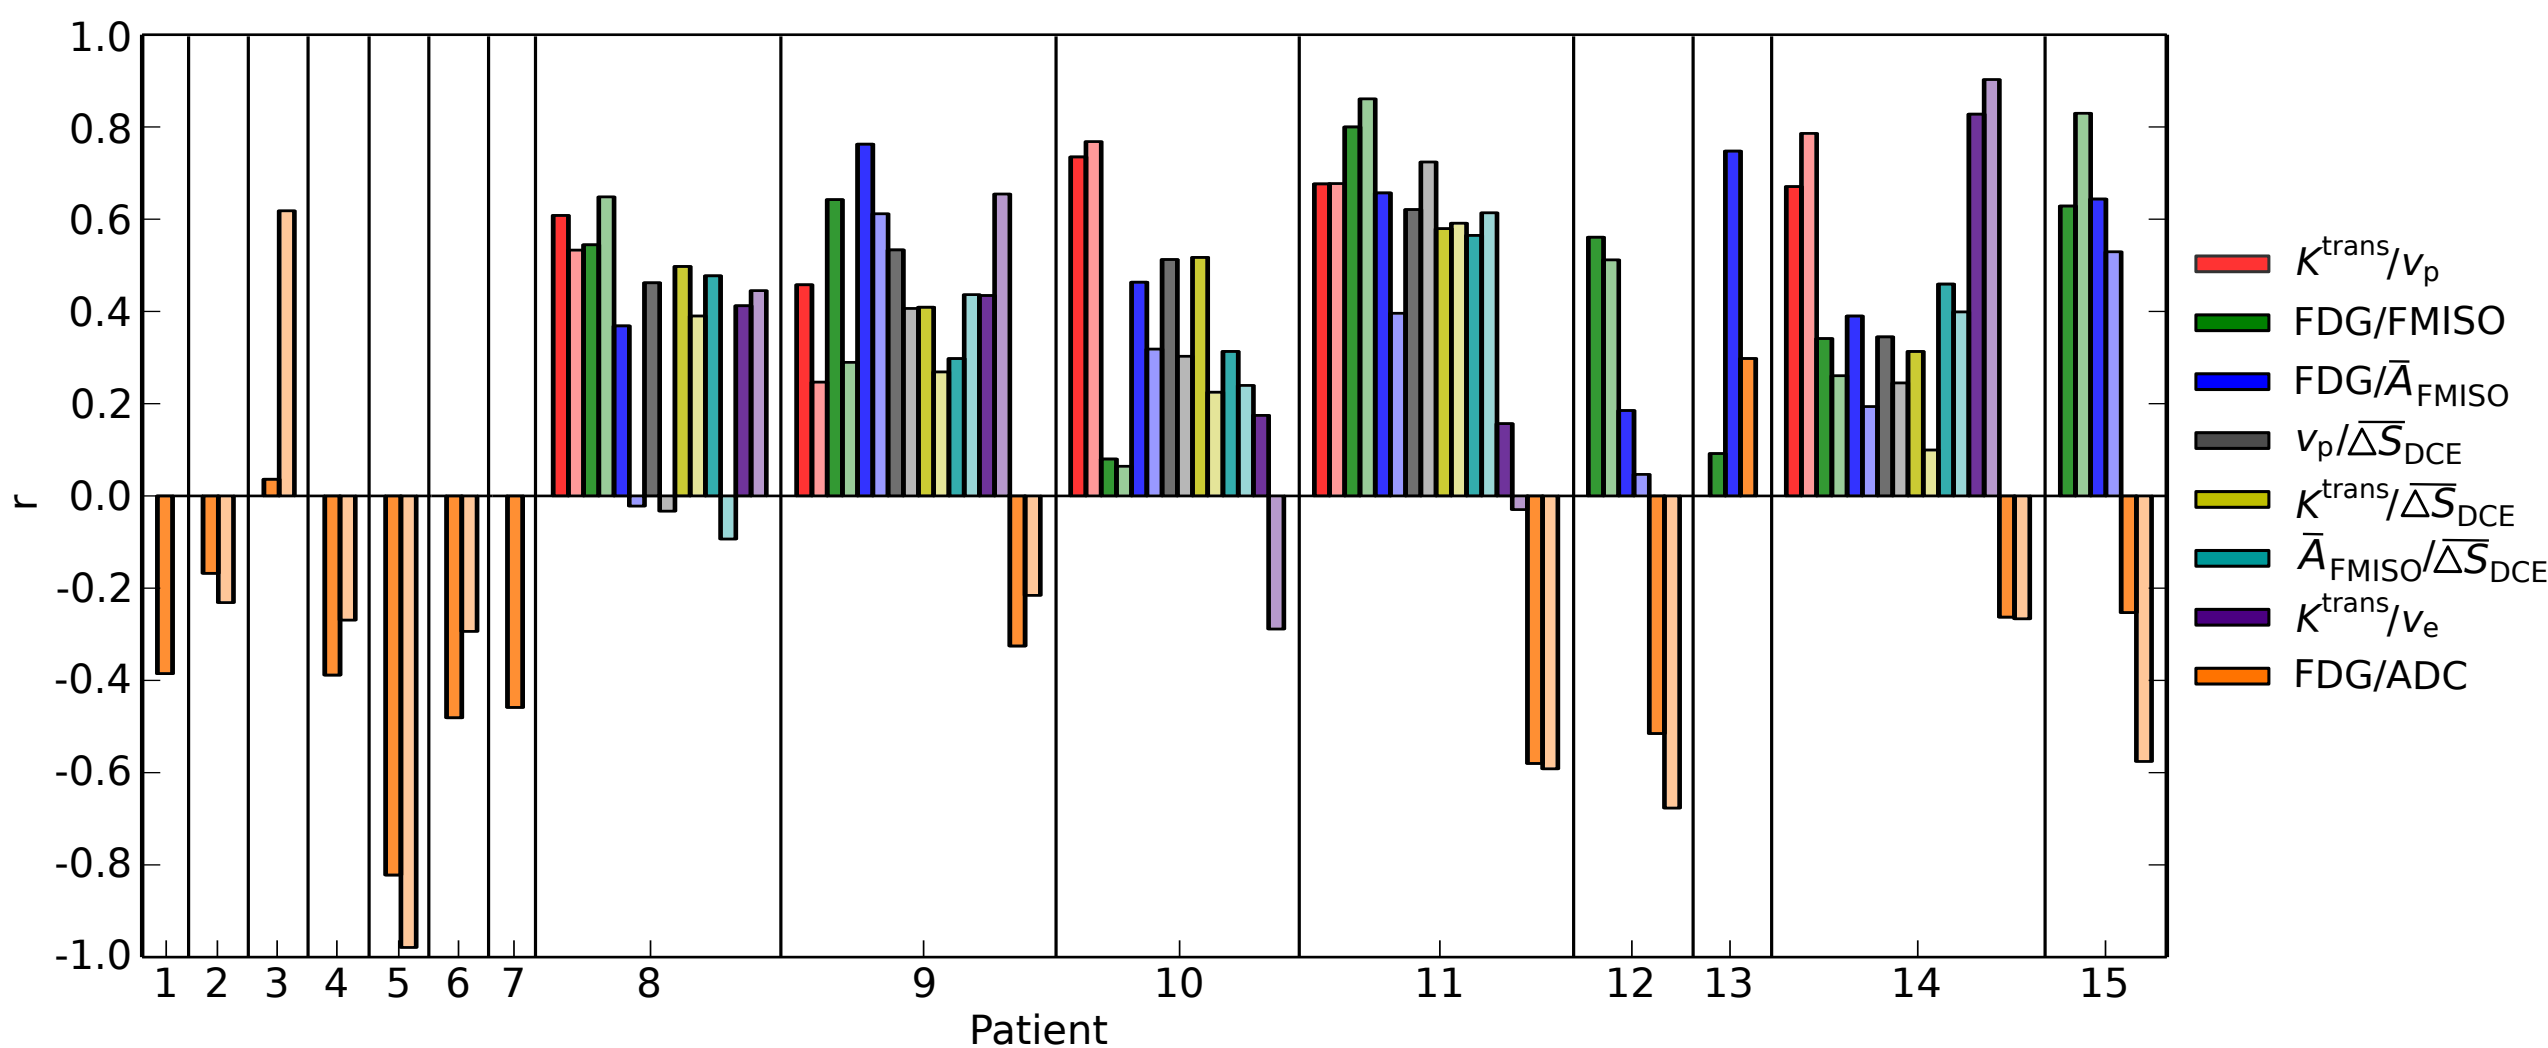

Supplement: 259_2016_3307_MOESM1_ESM.pdf [file 259_2016_3307_MOESM1_ESM.pdf]
